# Supplementary material for: Modification of hydrothermally synthesized α-Fe2O3 nanorods with g-C3N4 prepared from various precursors as photoanodes for hydrogen production
Source: Royal Society of Chemistry journal article supplement (doi:10.1039/d3nj05421g), 2024-01-01
Supplement: d3nj05421g1.pdf [file d3nj05421g1.pdf]

## SUPPORTING INFORMATION

### Modification of Hydrothermally Synthesized $\alpha$ - $\text{Fe}_2\text{O}_3$ Nanorods with $\text{g-C}_3\text{N}_4$ Prepared from Various Precursors as Photoanodes for Hydrogen Production

Muhammad Ibadurrohman<sup>\*1)</sup>, Afaf Qurrotu Ainin<sup>1)</sup>, Fakhri Zinul Alam<sup>1)</sup>, Nadia Mumtazah<sup>1)</sup>, Slamet<sup>1)</sup>, Alfian Ferdiansyah Madsuha<sup>2)</sup>, Reza Miftahul Ulum<sup>2)</sup>, and Bonavian Hasiholan<sup>3)</sup>

1) Department of Chemical Engineering, Faculty of Engineering, Universitas Indonesia, Depok, Indonesia 16424

2) Department of Metallurgical and Material Engineering, Faculty of Engineering, Universitas Indonesia, Depok, Indonesia 16424

3) Department of Chemical & Petroleum Engineering, UCSI University, 56000 Kuala Lumpur, Malaysia

\*corresponding author: [ibad@che.ui.ac.id](mailto:ibad@che.ui.ac.id)

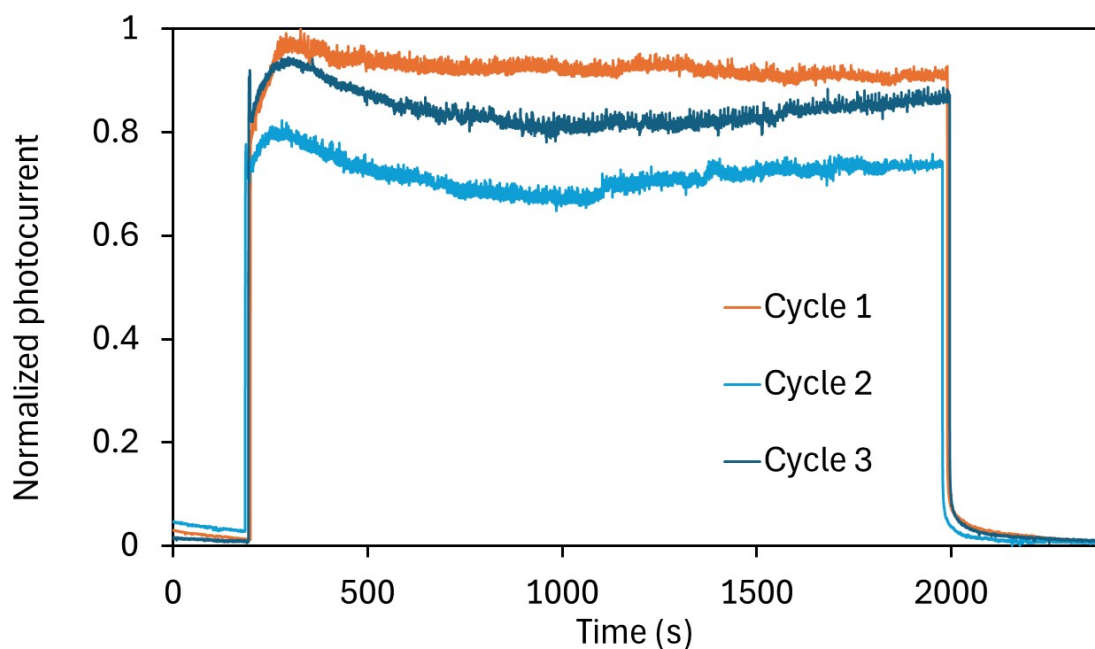

**Figure S1.** Longer operation of light-chopped chronoamperometric measurements  $\alpha$ - $\text{Fe}_2\text{O}_3/\text{g-C}_3\text{N}_4$  performed in three cycles (reused) without glycerol as a sacrificial agent. Note: the normalized photocurrent is the photocurrents divided by the highest photocurrent data point in all three cycles.
